# Supplementary material
Source: Royal Society of Chemistry journal article supplement (doi:10.1039/d6py00217j)
Supplement: d6py00217j1.pdf [file d6py00217j1.pdf]

# Dynamic exchange in vinylogous urethane vitrimers: computational and experimental approaches to screen structure-property relationships of dynamic bonds

*Jacopo Teotonico, Fernando Ruipérez\*, Nicholas Ballard\**

## SUPPORTING INFORMATION

### Synthetic Procedures

Synthesis of Methyl-3-(phenylamino)but-2-enoate (VU\_PhNH<sub>2</sub>):

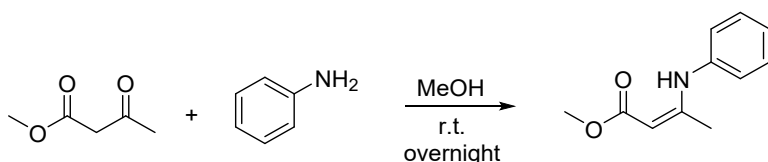

The synthesis of VU\_PhNH<sub>2</sub> was based on procedures published by Denissen *et al.*<sup>1</sup> Methyl acetoacetate (5g, 43 mmol) and aniline (8,4g, 90 mmol) were added in 30 mL of MeOH in a 100 mL round bottom flask. The reaction was stirred overnight at room temperature and the formation of the product was checked with thin-layer chromatography (TLC). The solvent was removed in vacuo and the mixture was extracted twice with brine and EtOAc. The combined organic phases were dried with MgSO<sub>4</sub> and evaporated, yielding the desired product as a yellowish liquid. The obtained product was purified by flash chromatography using EtOAc/hexane (v/v = 85/15) as the eluent. Yield of methyl-3-(phenylamino)but-2-enoate: 58%, 4.8 g. <sup>1</sup>H NMR

(400 MHz, DMSO-d<sup>6</sup>)  $\delta$  7.59 – 6.95 (m, 5H), 4.71 (d,  $J = 0.7$  Hz, 1H), 3.59 (s, 3H), 2.01 (d,  $J = 0.6$  Hz, 3H).

Synthesis of Methyl-3-(benzylamino)but-2-enoate (VU\_BnNH<sub>2</sub>):

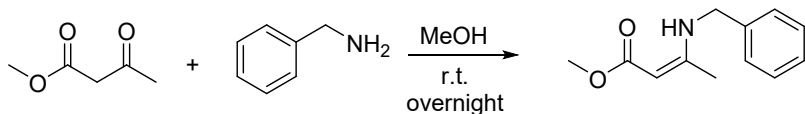

The synthesis of VU\_BnNH<sub>2</sub> was based on procedures published by Denissen *et al.*<sup>1</sup> Methyl acetoacetate (2g, 17 mmol) and benzylamine (3.6g, 34 mmol) were added in 20 mL of MeOH in a 100 mL round bottom flask. The reaction was stirred overnight at room temperature and the formation of the product was checked with thin-layer chromatography (TLC). The solvent was removed in vacuo and the mixture was extracted twice with brine and EtOAc. The combined organic phases were dried with MgSO<sub>4</sub> and evaporated, yielding the desired product as a yellowish liquid. Yield of methyl-3-(benzylamino)but-2-enoate: 98%, 3.40g. <sup>1</sup>H NMR (400 MHz, DMSO-d<sup>6</sup>)  $\delta$  8.95 – 8.79 (m, 1H), 7.45 – 7.18 (m, 4H), 4.48 – 4.46 (m, 2H), 4.44 (s, 1H), 3.50 (s, 3H), 1.90 (d,  $J = 0.6$  Hz, 3H).

Synthesis of Methyl-3-(furfurylamino)but-2-enoate (VU\_FuNH<sub>2</sub>):

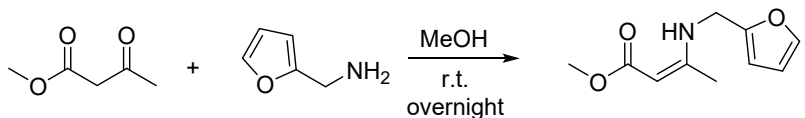

The synthesis of VU\_FuNH<sub>2</sub> was based on procedures published by Denissen *et al.*<sup>1</sup> Methyl acetoacetate (2g, 17 mmol) and furfurylamine (3.3g, 34 mmol) were added in 20 mL of MeOH in a 100 mL round bottom flask. The reaction was stirred overnight at room temperature and the formation of the product was checked with thin-layer chromatography (TLC). The solvent was removed in vacuo and the mixture was extracted twice with brine and EtOAc. The combined organic phases were dried with MgSO<sub>4</sub> and evaporated, yielding the desired product as a yellowish liquid. Yield of methyl-3-(furfurylamino)but-2-enoate: 98%, 3.26g. <sup>1</sup>H NMR (400 MHz, DMSO-d<sub>6</sub>) δ 8.69 (t, J = 6.2 Hz, 1H), 6.42 (dd, J = 3.2, 1.9 Hz, 1H), 6.30 (dt, J = 3.2, 0.8 Hz, 1H), 4.46 (d, J = 0.7 Hz, 1H), 4.44 (t, J = 0.7 Hz, 2H), 3.48 (s, 3H), 1.97 (d, J = 0.6 Hz, 3H).

Synthesis of Methyl-3-(butylamino)but-2-enoate (VU\_BuNH<sub>2</sub>):

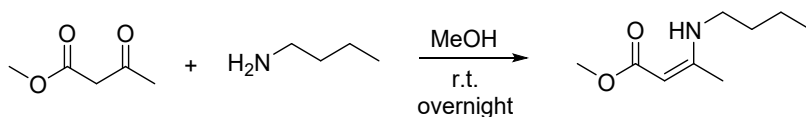

The synthesis of VU\_BuNH<sub>2</sub> was based on procedures published by Denissen *et al.*<sup>1</sup> Methyl acetoacetate (2g, 17 mmol) and butylamine (2.5g, 34 mmol) were added in 20 mL of MeOH in a 100 mL round bottom flask. The reaction was stirred overnight at room temperature and the formation of the product was checked with thin-layer chromatography (TLC). The solvent was removed in vacuo and the mixture was extracted twice with brine and EtOAc. The combined organic phases were dried with MgSO<sub>4</sub> and evaporated, yielding the desired product as a yellowish liquid. Yield of methyl-3-(butylamino)but-2-enoate: 98%, 2.79g. <sup>1</sup>H NMR (400 MHz,

DMSO-d<sup>6</sup>)  $\delta$  8.50 (s, 1H), 4.35 (d, J = 0.6 Hz, 1H), 3.47 (s, 3H), 3.20 (td, J = 6.9, 5.8 Hz, 2H), 1.89 (d, J = 0.6 Hz, 3H), 1.53 – 1.40 (m, 2H), 1.41 – 1.26 (m, 2H), 0.95 – 0.85 (m, 3H).

Synthesis of Methyl-3-(2-ethylhexylamino)but-2-enoate (VU\_2EHA):

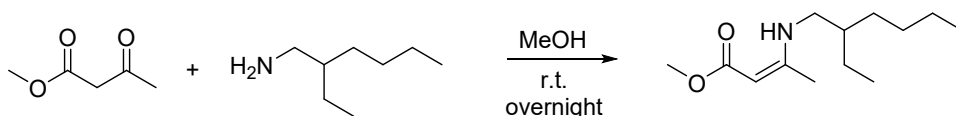

The synthesis of VU\_2EHA was based on procedures published by Denissen *et al.*<sup>1</sup> Methyl acetoacetate (2g, 17 mmol) and 2-ethylhexylamine (4.4g, 34 mmol) were added in 20 mL of MeOH in a 100 mL round bottom flask. The reaction was stirred overnight at room temperature and the formation of the product was checked with thin-layer chromatography (TLC). The solvent was removed in vacuo and the mixture was extracted twice with brine and EtOAc. The combined organic phases were dried with MgSO<sub>4</sub> and evaporated, yielding the desired product as a yellowish liquid. Yield of methyl-3-(2-ethylhexylamino)but-2-enoate: 99%, 3.74g. <sup>1</sup>H NMR (400 MHz, DMSO-d<sup>6</sup>)  $\delta$  8.60 (t, J = 5.8 Hz, 1H), 4.36 (d, J = 0.7 Hz, 1H), 3.48 (s, 3H), 3.13 (td, J = 5.9, 0.8 Hz, 2H), 1.89 (d, J = 0.6 Hz, 4H), 1.39 – 1.19 (m, 13H), 0.92 – 0.79 (m, 7H).

Synthesis of Methyl-3-(3-propanolamino)but-2-enoate (VU\_3MET):

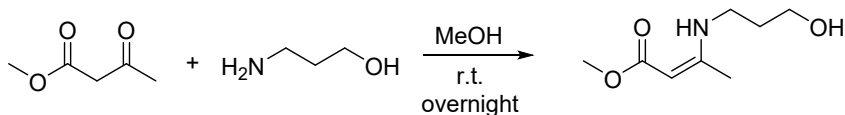

The synthesis of VU\_3MET was based on procedures published by Denissen *et al.*<sup>1</sup> Methyl acetoacetate (2g, 17 mmol) and 3-aminopropanol (2,55g, 34 mmol) were added in 20 mL of MeOH in a 100 mL round bottom flask. The reaction was stirred overnight at room temperature and the formation of the product was checked with thin-layer chromatography (TLC). The solvent was removed in vacuo and the mixture was extracted twice with brine and EtOAc. The combined organic phases were dried with MgSO<sub>4</sub> and evaporated, yielding the desired product as a yellowish liquid. Yield of methyl-3-(3-aminopropanol)but-2-enoate: 94%, 2,61g. <sup>1</sup>H NMR (300 MHz, CDCl<sub>3</sub>) δ 8.54 (s, 1H), 4.43 (s, 1H), 3.71 (t, 1H), 3.59 (s, 5H), 3.33 (t, 1H), 1.92 (s, 5H), 1.86 – 1.71 (m, 1H).

Synthesis of Methyl-3-(3-methoxypropylamino)but-2-enoate (VU\_3APO):

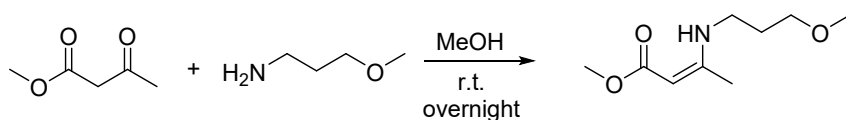

The synthesis of VU\_3APO was based on procedures published by Denissen *et al.*<sup>1</sup> Methyl acetoacetate (2g, 17 mmol) and 3-methoxypropylamine (3g, 34 mmol) were added in 20 mL of MeOH in a 100 mL round bottom flask. The reaction was stirred overnight at room temperature and the formation of the product was checked with thin layer chromatography (TLC). The solvent was removed in vacuo and the mixture was extracted twice with brine and EtOAc. The combined organic phases were dried with MgSO<sub>4</sub> and evaporated, yielding the desired product as a yellowish liquid. Yield of methyl-3-(3-methoxypropylamine)but-2-enoate: 97%, 3,07g. <sup>1</sup>H NMR

(300 MHz, DMSO)  $\delta$  8.52 (s, 1H), 4.37 (s, 1H), 3.49 (s, 4H), 3.37 (t, 2H), 3.32 – 3.27 (m, 1H), 3.25 (s, 4H), 1.90 (s, 4H), 1.77 – 1.67 (m, 1H).

Synthesis of Methyl-3-(N,N-dimethyl-1,3-propanediamino)but-2-enoate (VU\_N,NDIAM):

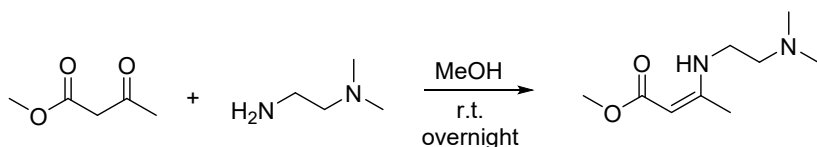

The synthesis of VU\_N,NDIAM was based on procedures published by Denissen *et al.*<sup>1</sup> Methyl acetoacetate (2g, 17 mmol) and N,N-dimethylethylenediamine (3g, 34 mmol) were added in 20 mL of MeOH in a 100 mL round bottom flask. The reaction was stirred overnight at room temperature and the formation of the product was checked with thin layer chromatography (TLC). The solvent was removed in vacuo and the mixture was extracted twice with brine and EtOAc. The combined organic phases were dried with MgSO<sub>4</sub> and evaporated, yielding the desired product as a yellowish liquid. Yield of methyl-3-(N,N-dimethyl-1,3-propanediamino)but-2-enoate: 96%, 3,03g. <sup>1</sup>H NMR (300 MHz, Chloroform-d)  $\delta$  8.63 (s, 1H), 4.47 (d, J = 0.7 Hz, 1H), 3.64 (d, J = 1.2 Hz, 3H), 3.31 (td, J = 6.6, 5.6 Hz, 2H), 2.48 (t, J = 6.6 Hz, 2H), 2.28 (s, 6H), 1.94 (d, J = 0.6 Hz, 3H).

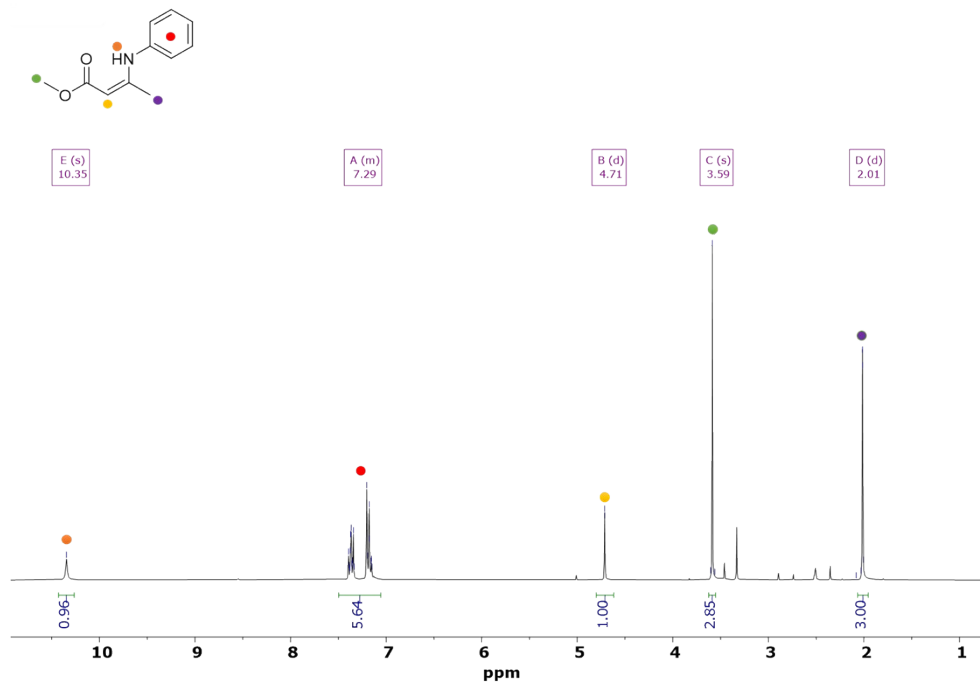

**Figure S1:**  $^1\text{H-NMR}$  (400 MHz,  $\text{dms}\text{-d}_6$ ) spectrum of  $\text{VU\_PhNH}_2$

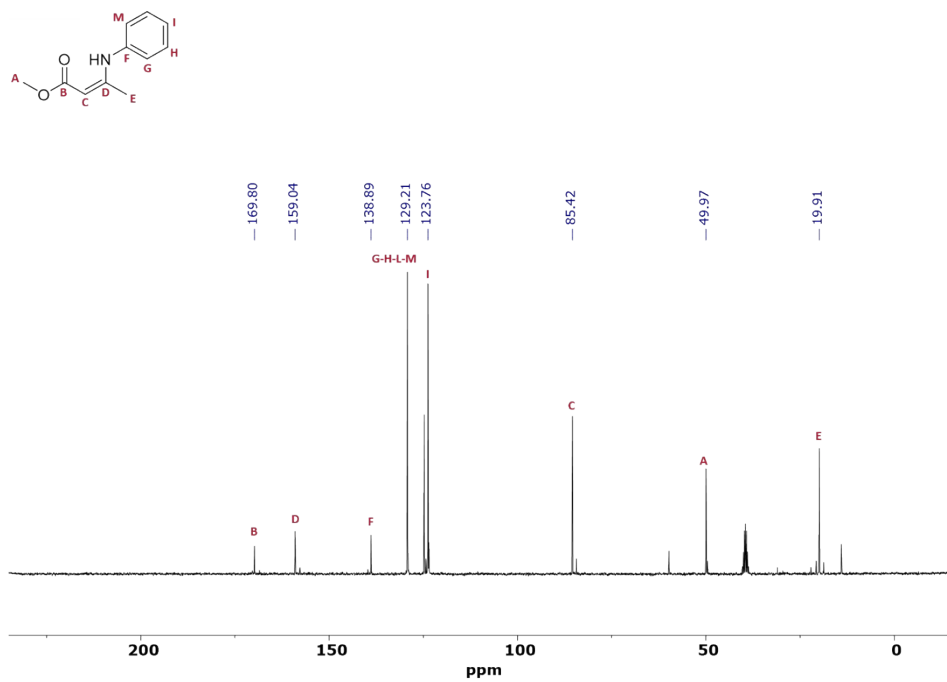

**Figure S2:**  $^{13}\text{C-NMR}$  (400 MHz,  $\text{dms}\text{-d}_6$ ) spectrum of  $\text{VU\_PhNH}_2$

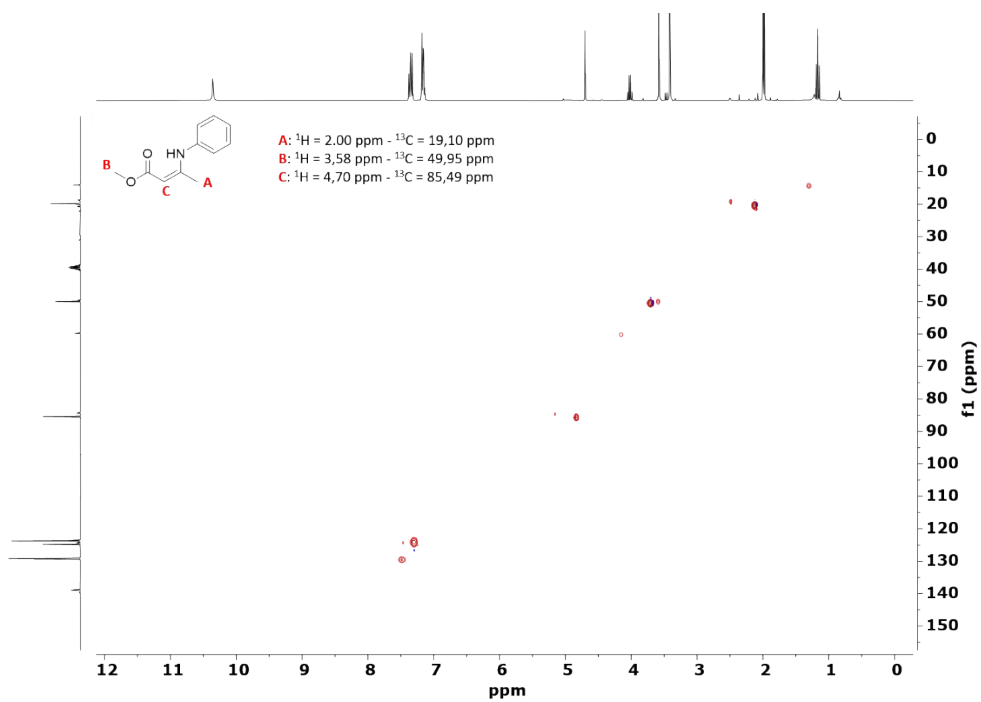

**Figure S3:** HSQC NMR (400 MHz, dms $o$ -d $_6$ ) spectrum of VU\_PhNH $_2$ .

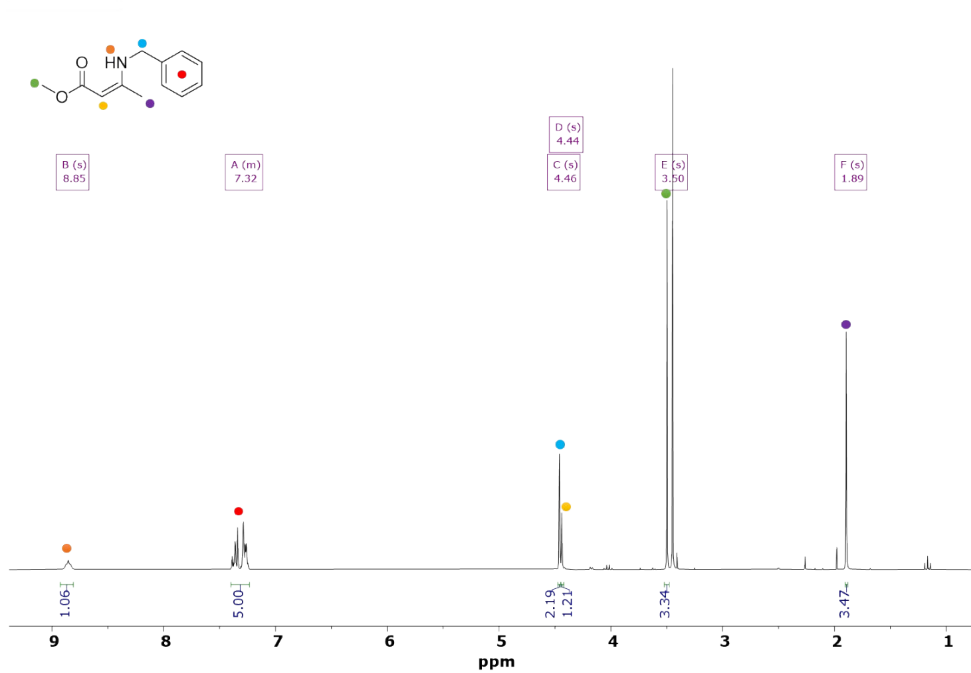

**Figure S4:**  $^1\text{H}$ -NMR (400 MHz, dms $o$ -d $_6$ ) spectrum of VU\_BnNH $_2$ .

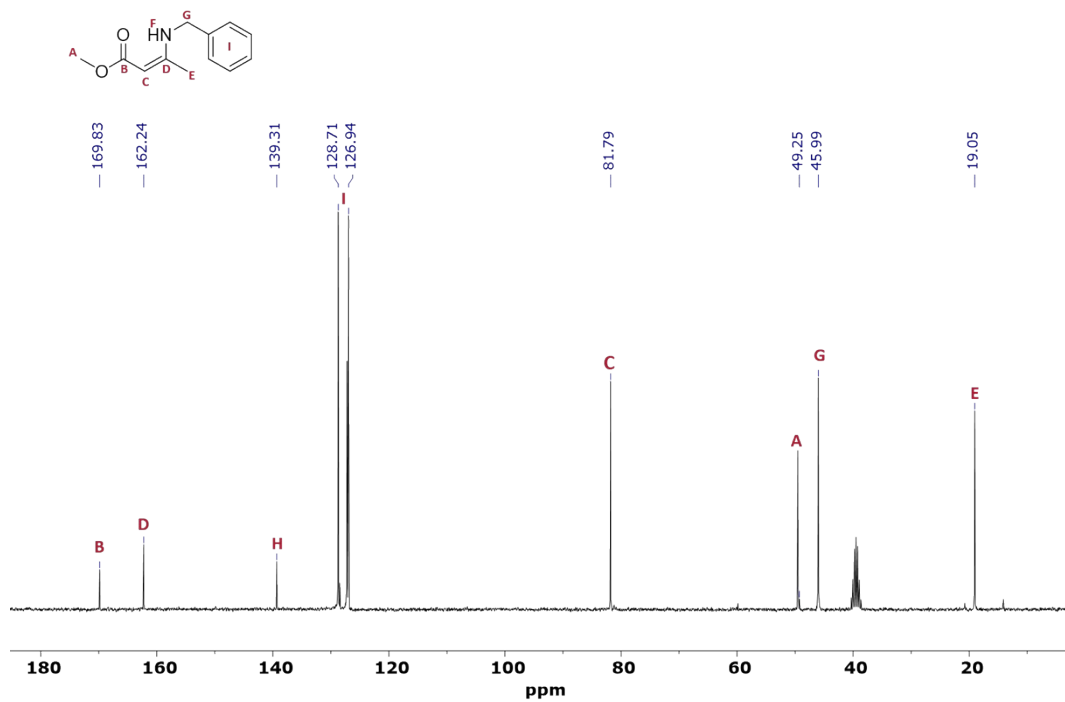

**Figure S5:** <sup>13</sup>C-NMR (400 MHz, dms<sub>o</sub>-d<sub>6</sub>) spectrum of VU\_BnNH<sub>2</sub>.

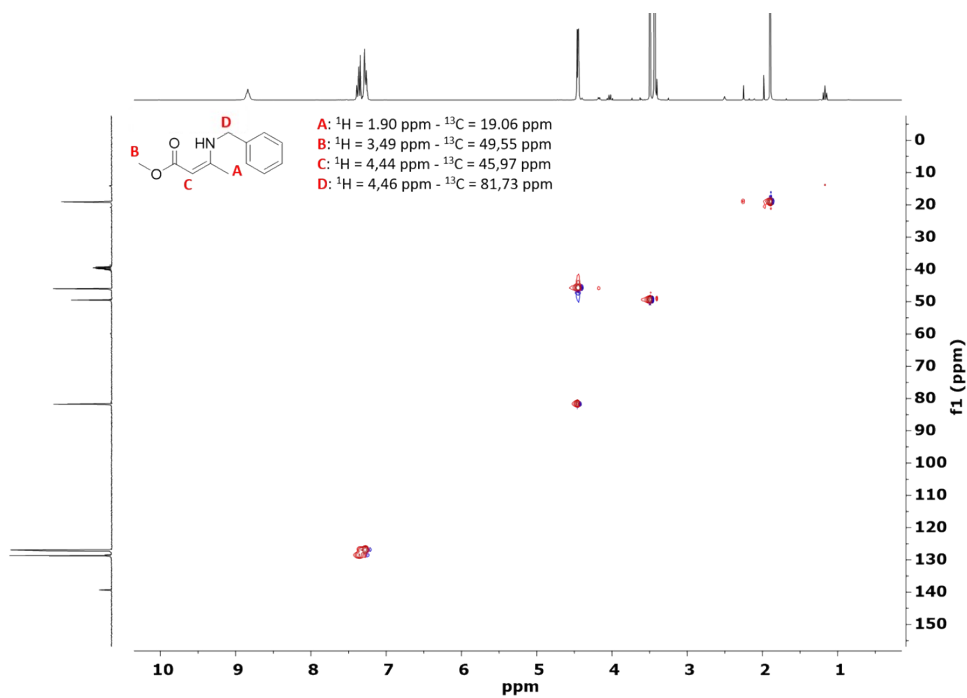

**Figure S6:** HSQC NMR (400 MHz, dms<sub>o</sub>-d<sub>6</sub>) spectrum of VU\_BnNH<sub>2</sub>.

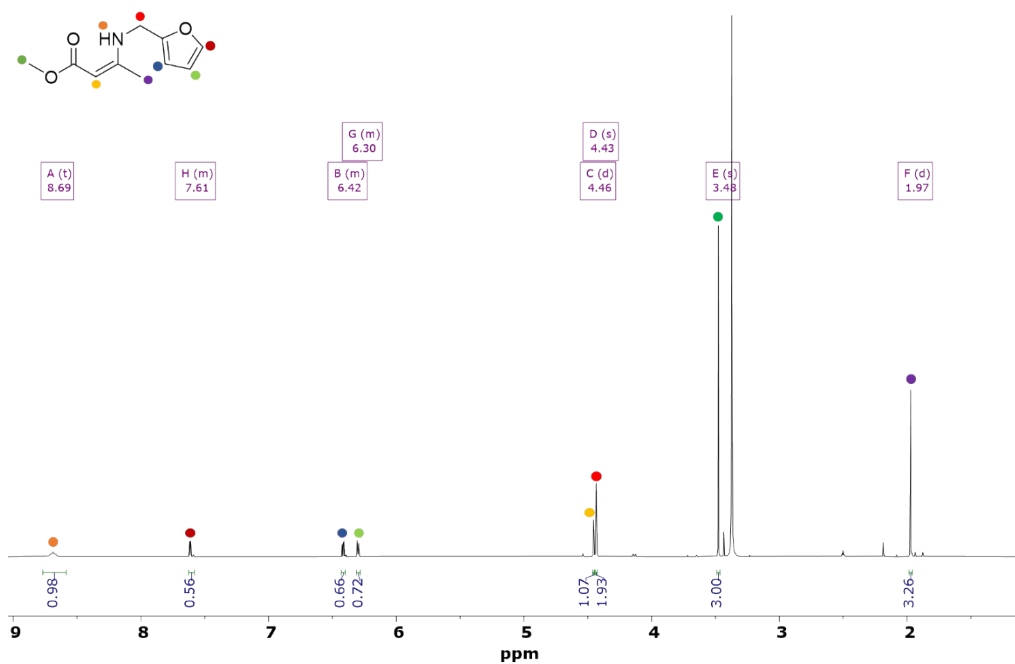

**Figure S7:** <sup>1</sup>H-NMR (400 MHz, dms<sub>o</sub>-d<sub>6</sub>) spectrum of VU\_FuNH<sub>2</sub>.

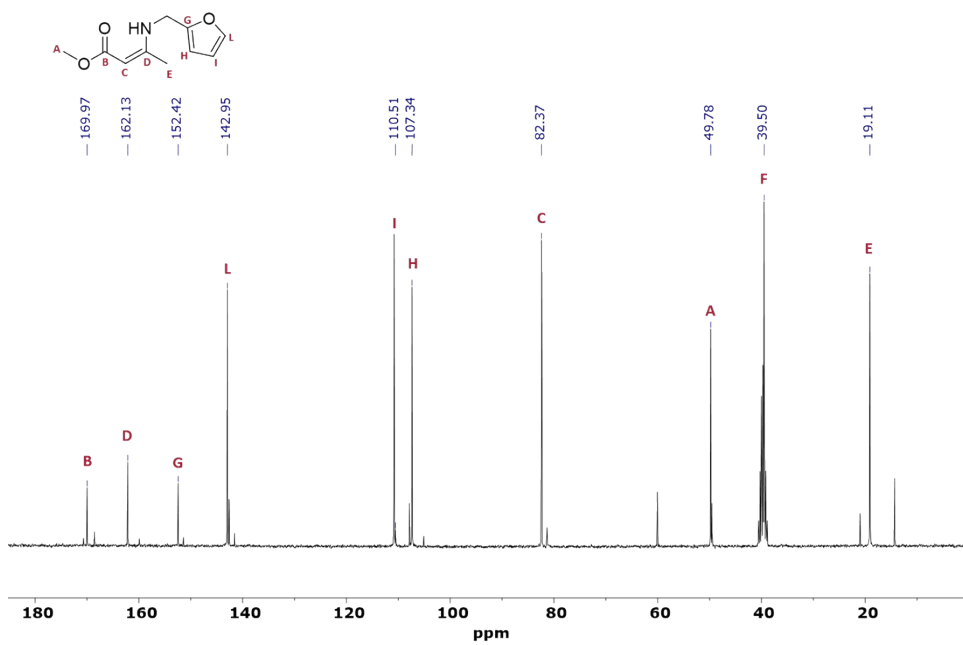

**Figure S8:** <sup>13</sup>C-NMR (400 MHz, dms<sub>o</sub>-d<sub>6</sub>) spectrum of VU\_FuNH<sub>2</sub>.

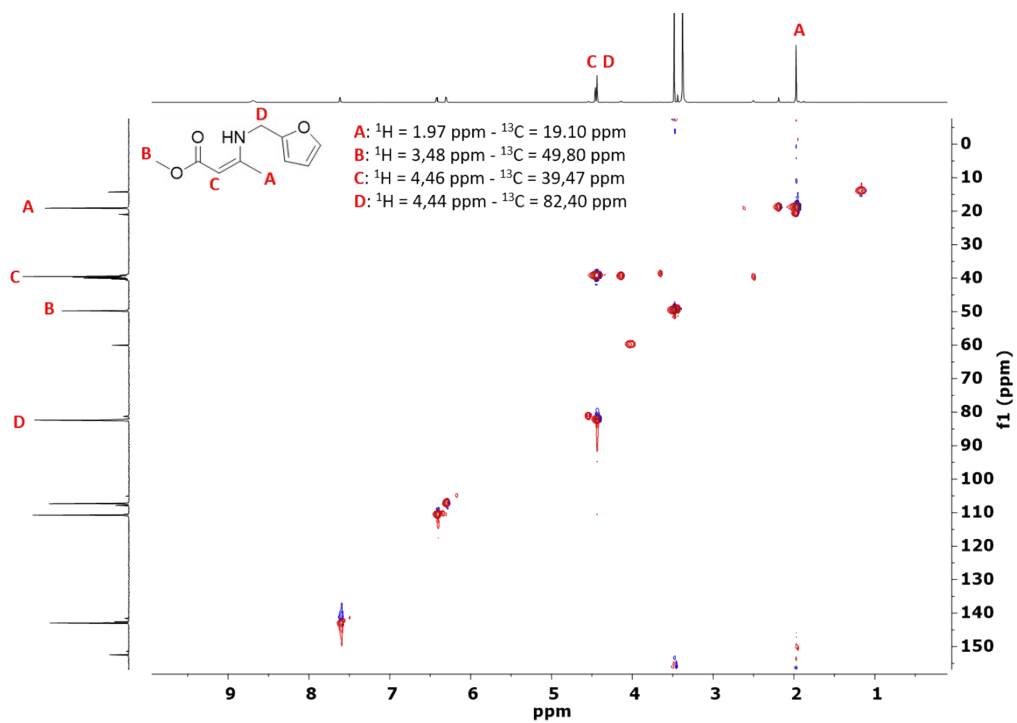

**Figure S9:** HSQC NMR (400 MHz,  $\text{dms}\text{-d}_6$ ) spectrum of  $\text{VU\_FuNH}_2$ .

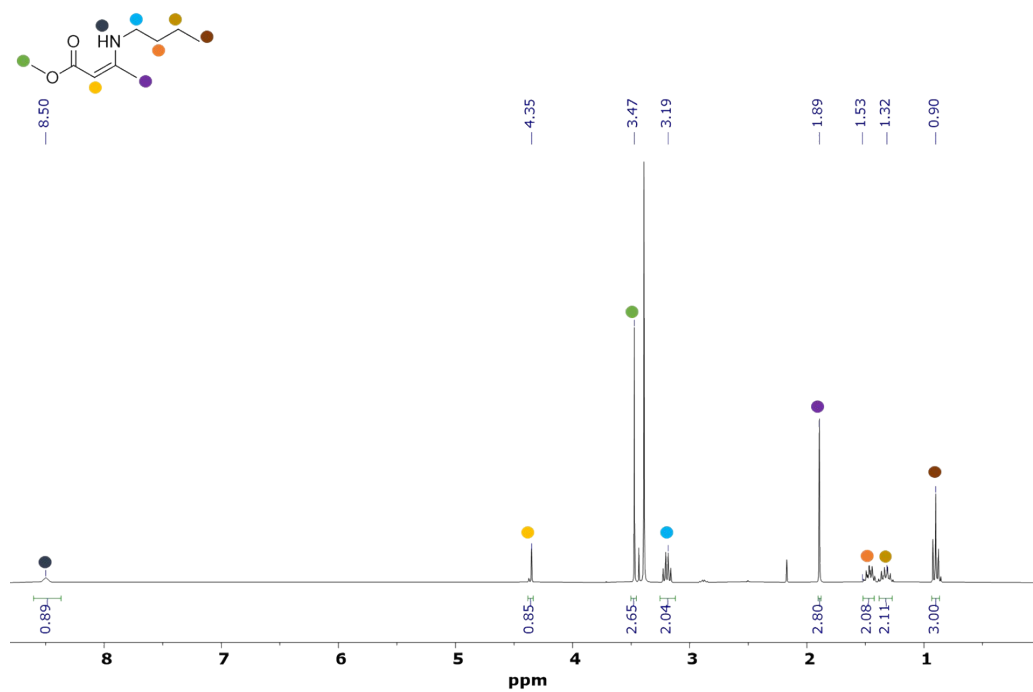

**Figure S10:**  $^1\text{H}$ -NMR (400 MHz,  $\text{dms}\text{-d}_6$ ) spectrum of  $\text{VU\_BuNH}_2$ .

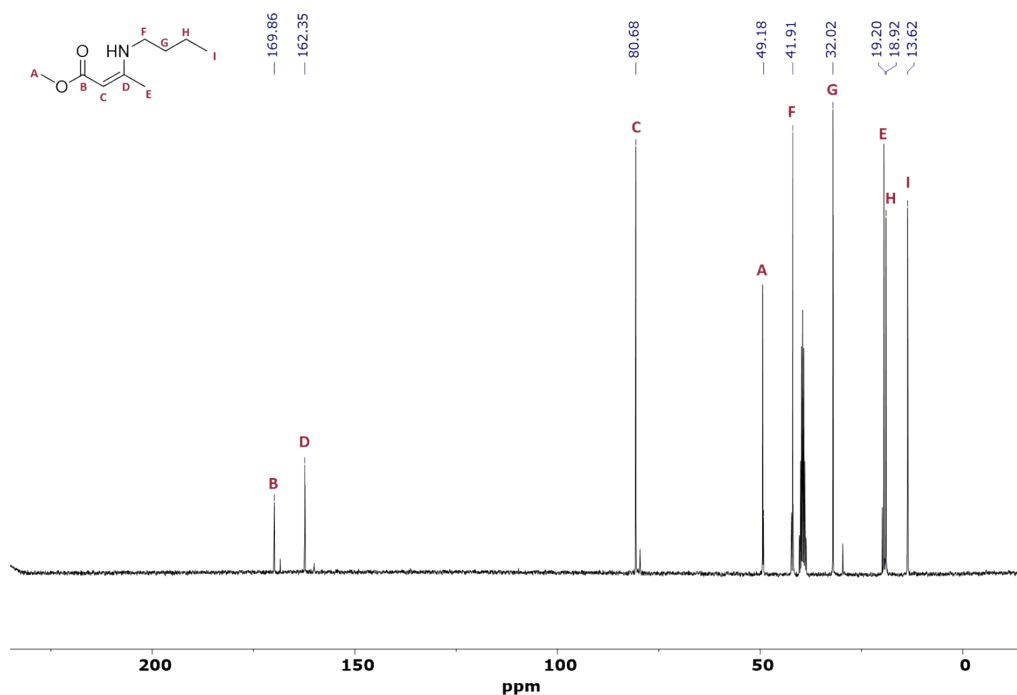

Figure S11: <sup>13</sup>C-NMR (400 MHz, dms<sup>o</sup>-d<sup>6</sup>) spectrum of VU\_BuNH<sub>2</sub>.

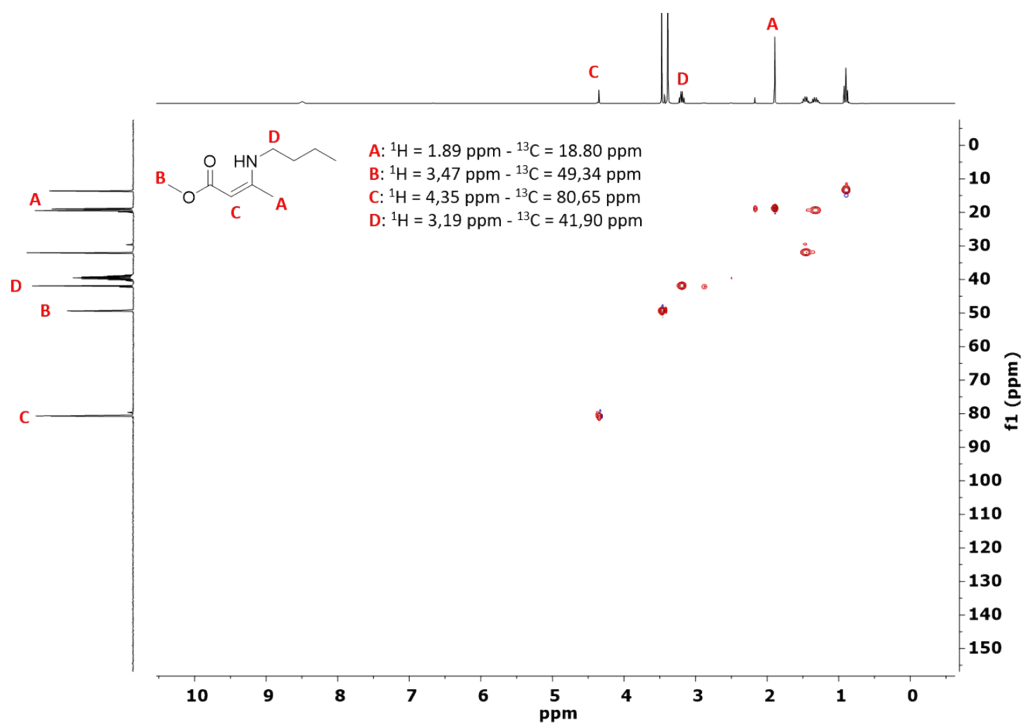

Figure S12: HSQC NMR (400 MHz, dms<sup>o</sup>-d<sup>6</sup>) spectrum of VU\_BuNH<sub>2</sub>.

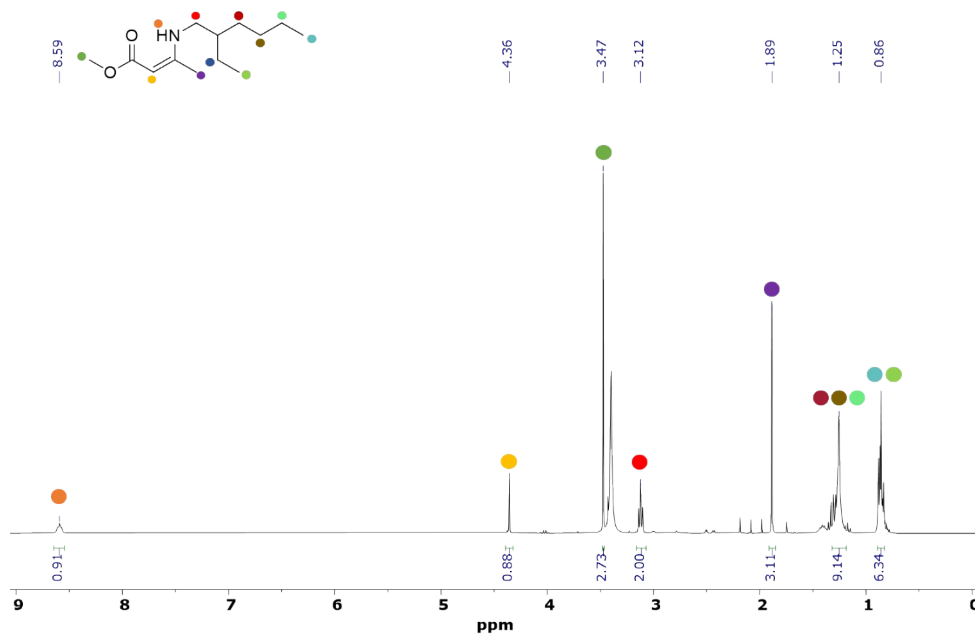

**Figure S13:**  $^1\text{H-NMR}$  (400 MHz,  $\text{dms0-d}^6$ ) spectrum of VU\_2EHA.

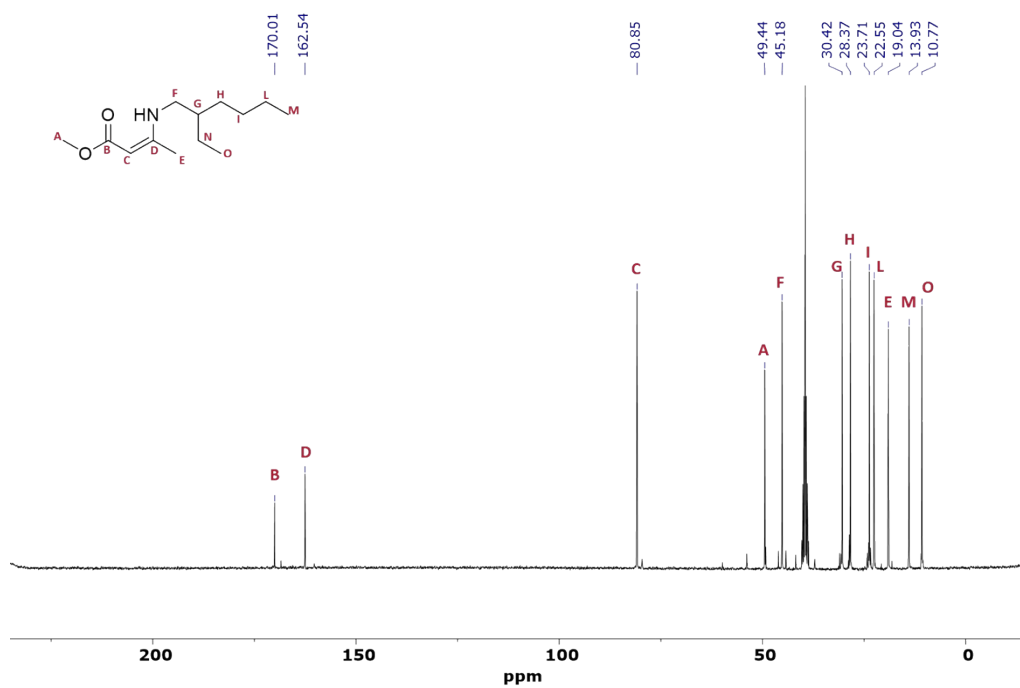

**Figure S14:**  $^{13}\text{C-NMR}$  (400 MHz,  $\text{dms0-d}^6$ ) spectrum of VU\_2EHA.

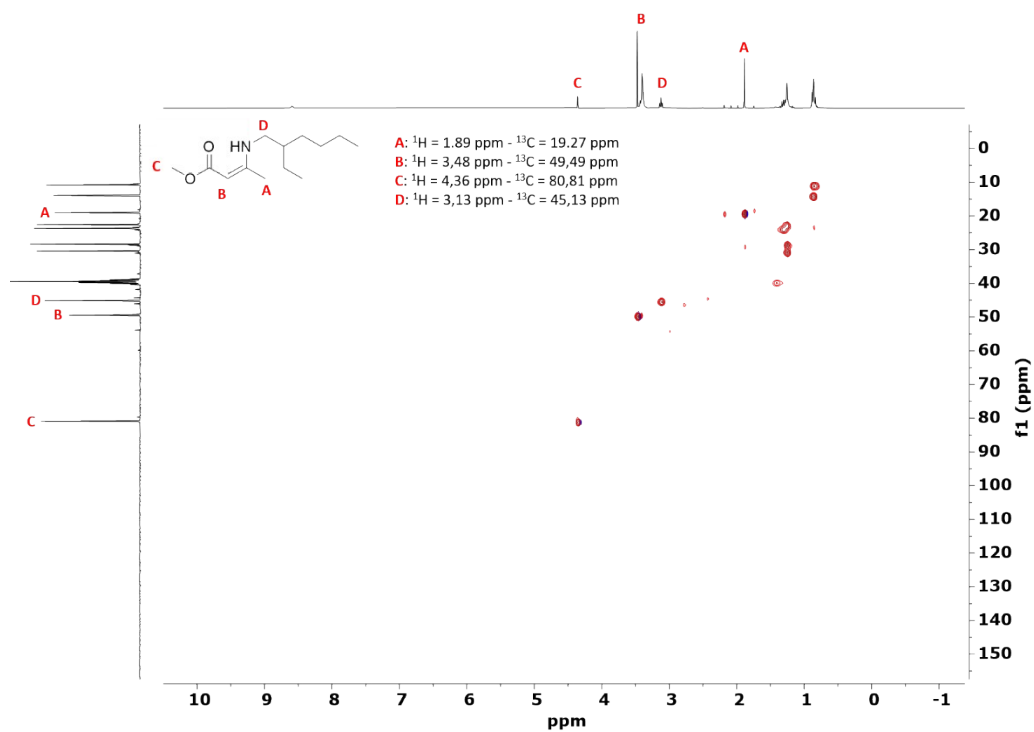

**Figure S15:** HSQC NMR (400 MHz,  $\text{dms}\text{-d}_6$ ) spectrum of VU\_2EHA.

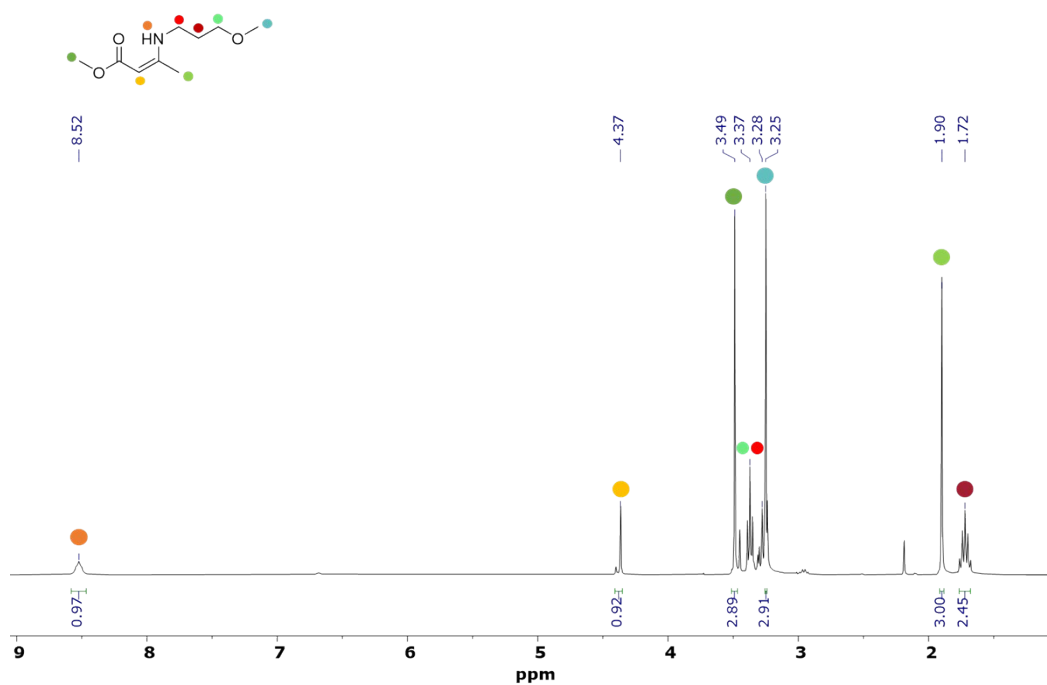

**Figure S16 :**  $^1\text{H}$ -NMR (400 MHz,  $\text{dms}\text{-d}_6$ ) spectrum of VU\_3MET.

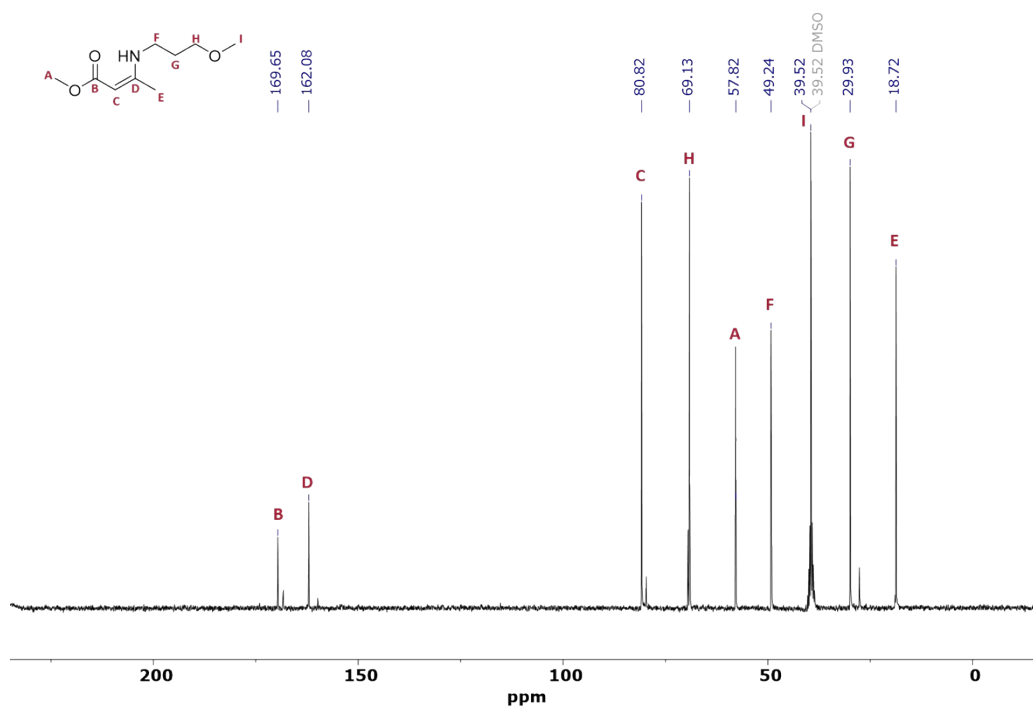

Figure S17:  $^{13}\text{C}$ -NMR (400 MHz, dms $o$ - $d_6$ ) spectrum of VU\_3MET.

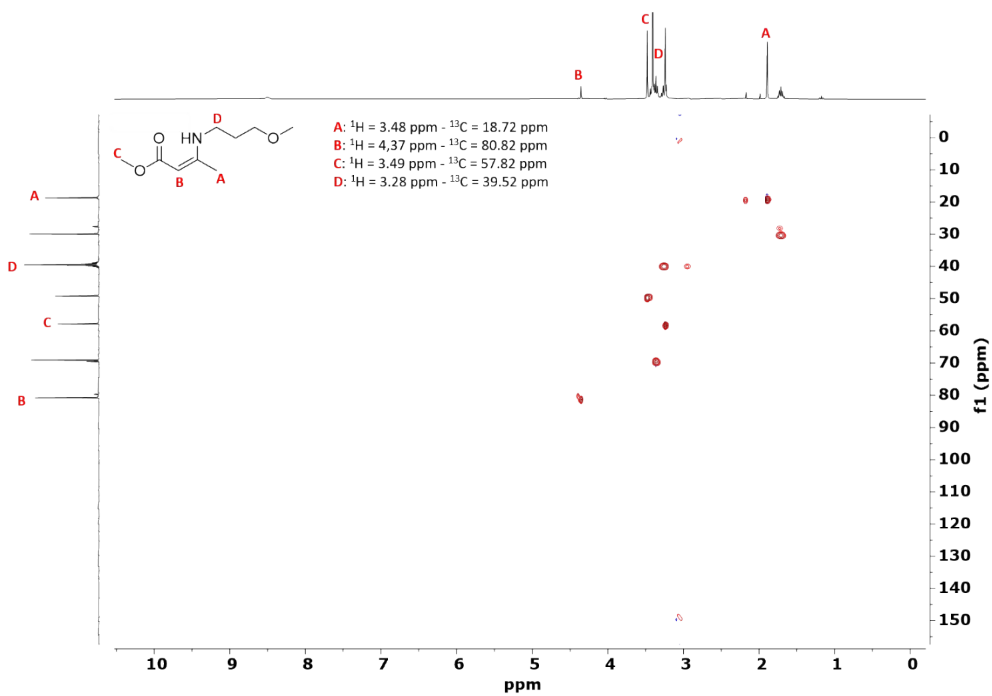

Figure S18: HSQC NMR (400 MHz, dms $o$ - $d_6$ ) spectrum of VU\_3MET.

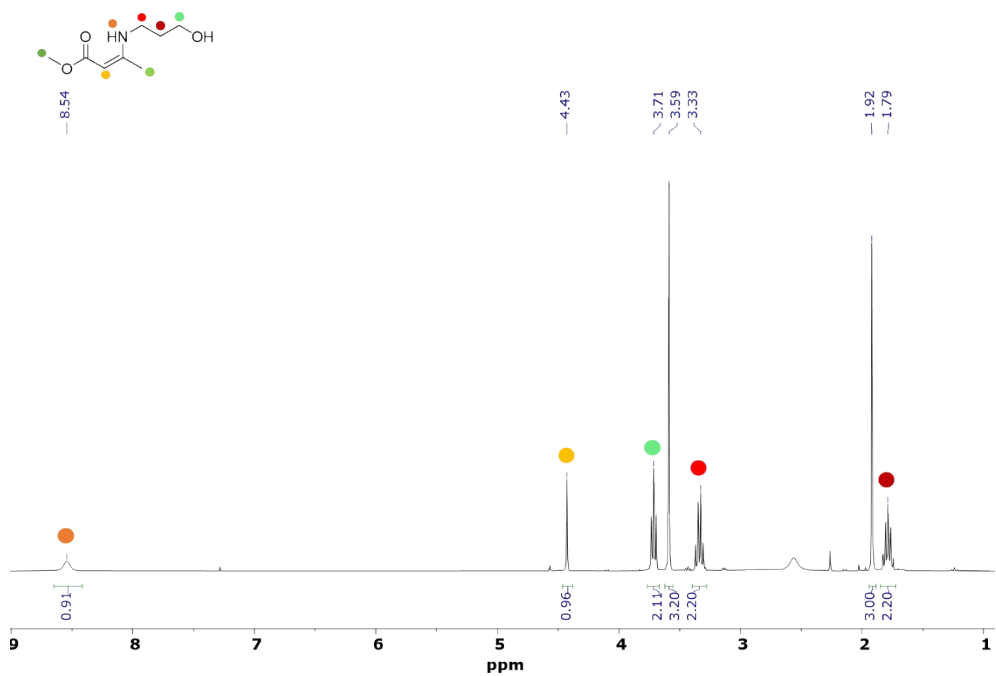

Figure S19:  $^1\text{H-NMR}$  (400 MHz,  $\text{dms}\text{-d}_6$ ) spectrum of VU\_3APO.

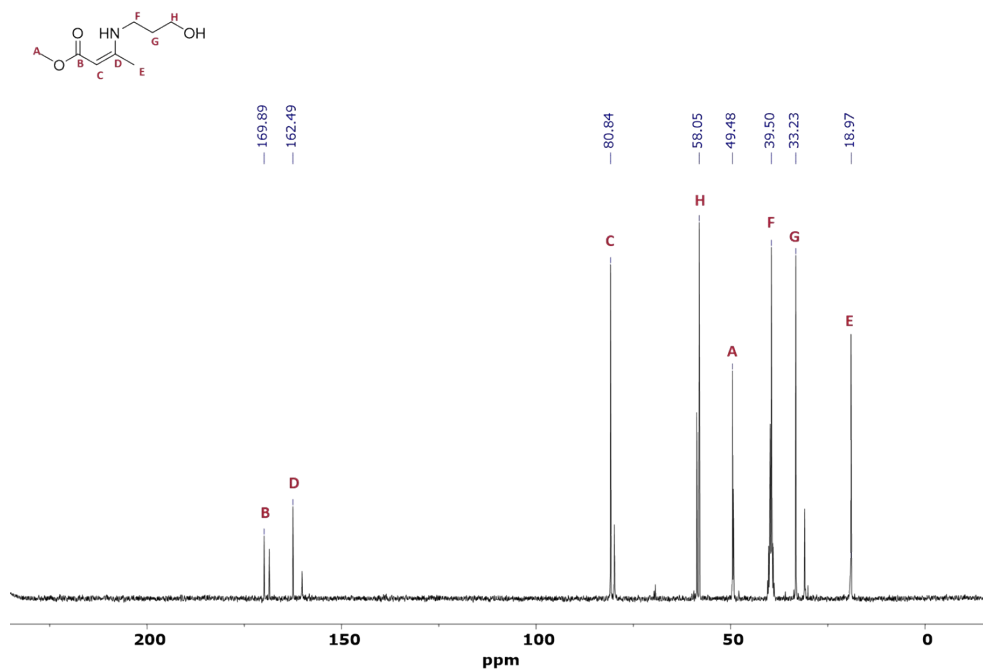

Figure S20:  $^{13}\text{C-NMR}$  (400 MHz,  $\text{dms}\text{-d}_6$ ) spectrum of VU\_3APO.

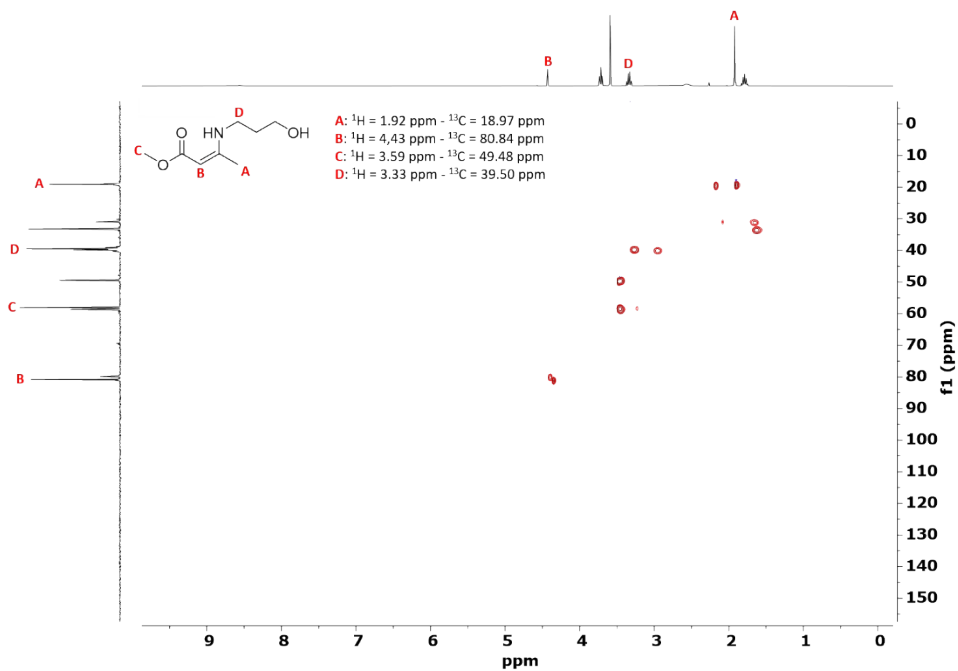

**Figure S21:** HSQC NMR (400 MHz,  $\text{dms}\text{-d}_6$ ) spectrum of VU\_3APO.

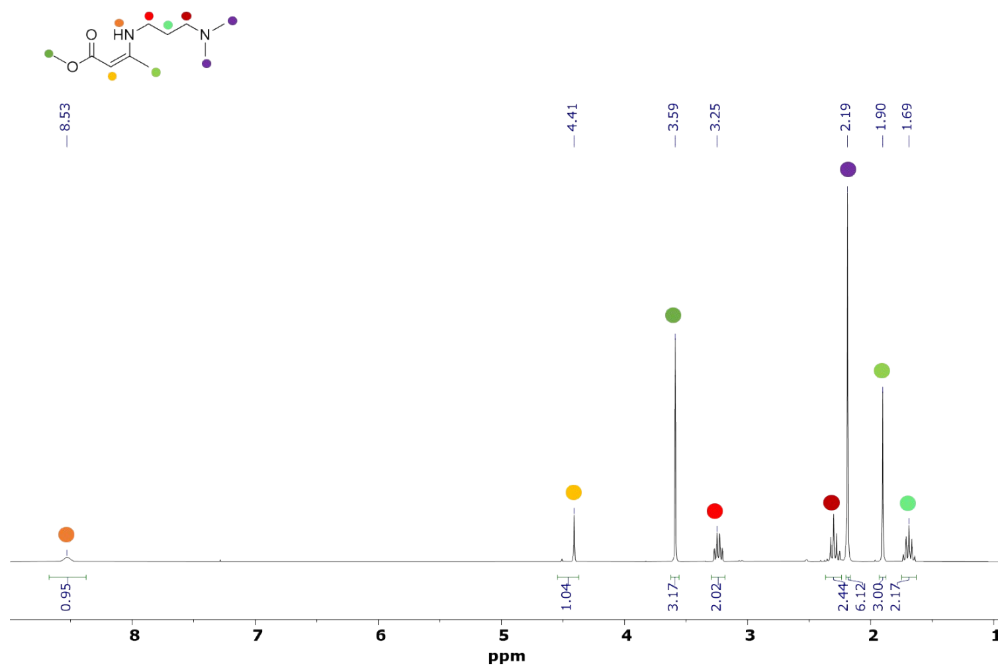

**Figure S22:**  $^1\text{H}$ -NMR (400 MHz,  $\text{dms}\text{-d}_6$ ) spectrum of VU\_N,NDIAM.

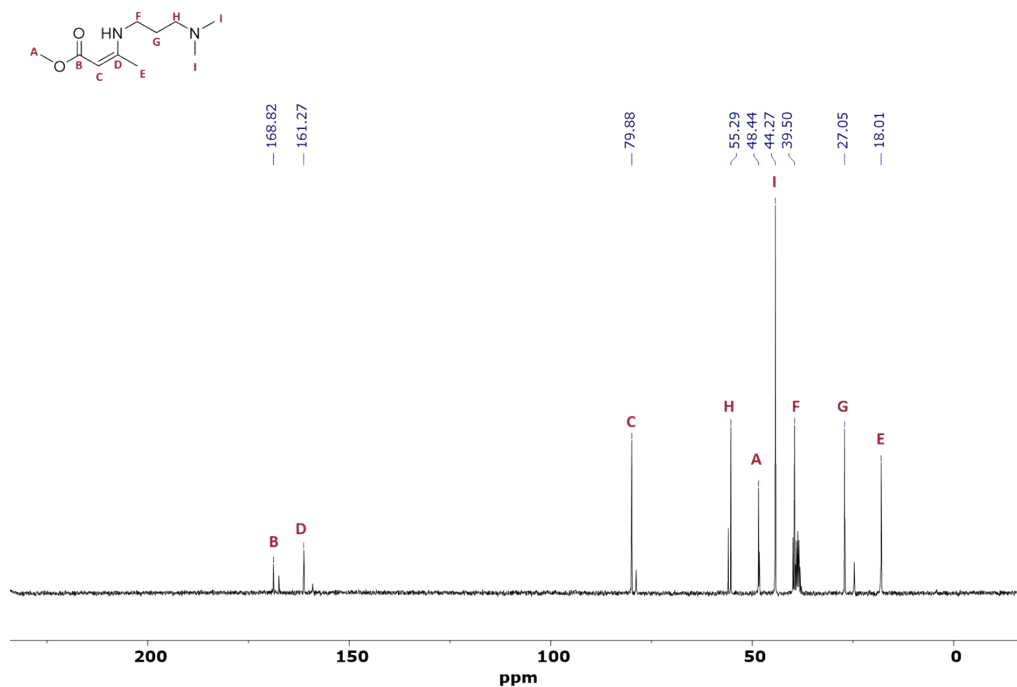

Figure S23:  $^{13}\text{C}$ -NMR (400 MHz,  $\text{dms}\text{-d}_6$ ) spectrum of VU\_N,NDIAM.

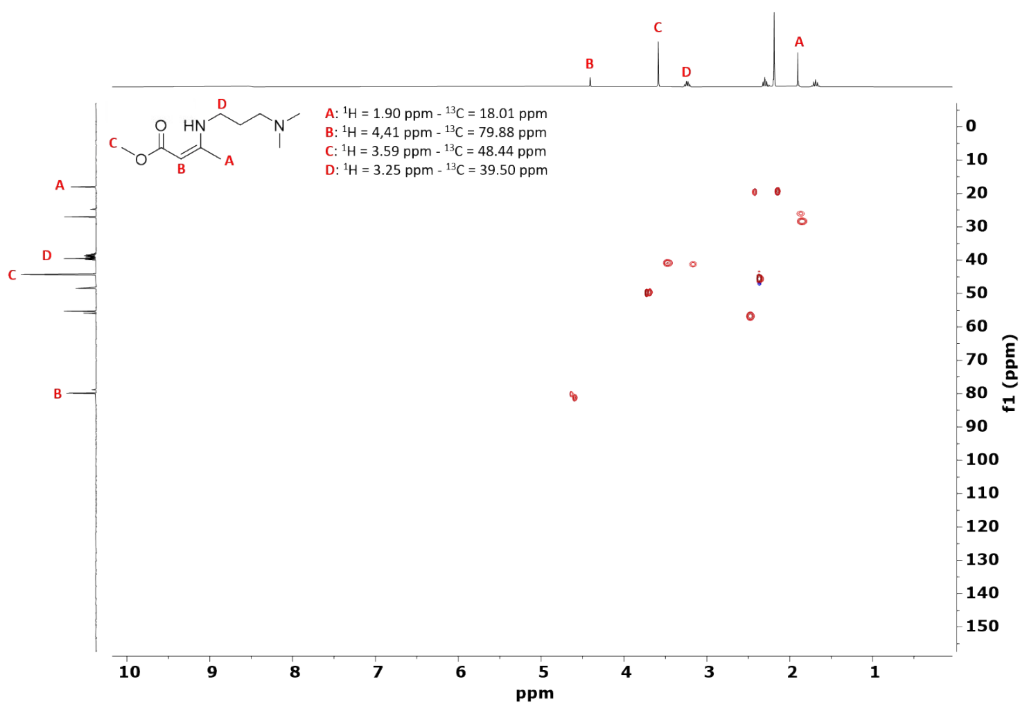

Figure S24: HSQC NMR (400 MHz,  $\text{dms}\text{-d}_6$ ) spectrum of VU\_N,NDIAM.

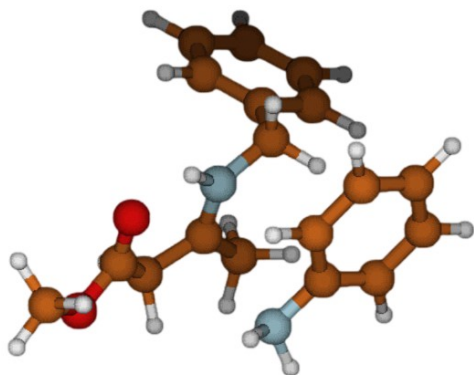

**Figure S25:** Example of INT3 in cis-conformation. This conformation is stabilized by hydrogen bonding between the NH group and the oxygen of the carbonyl group.

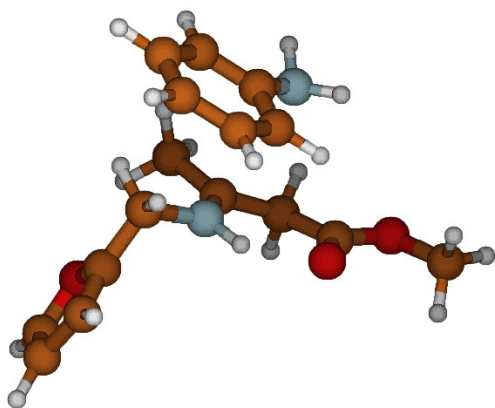

**Figure S26:** INT3 of the exchange between VU\_PhNH<sub>2</sub> and FuNH<sub>2</sub>. The vinylous urethane structure is stabilized by the hydrogen bonding between the NH group and the oxygen of the carbonyl group (1.840 Å). The NH group of the aniline is distant 3.178 Å from the methylene carbon of the vinylous urethane from which it will later abstract the proton (TS4).

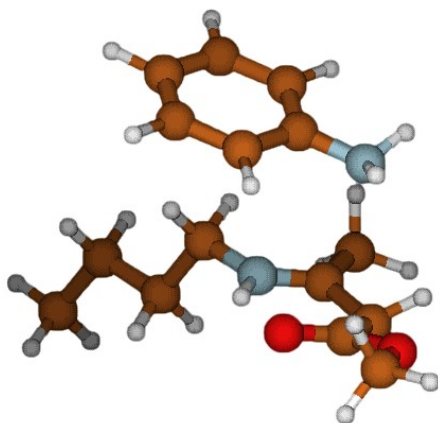

**Figure S27:** INT3 of the exchange between VU\_PhNH<sub>2</sub> and BuNH<sub>2</sub>. The vinylogous urethane structure is stabilized by the hydrogen bonding between the NH group and the oxygen of the carbonyl group (1.839 Å). The NH group of the aniline is distant 3.16 Å from the methylene carbon of the vinylogous urethane from which it will later abstract the proton (TS4).

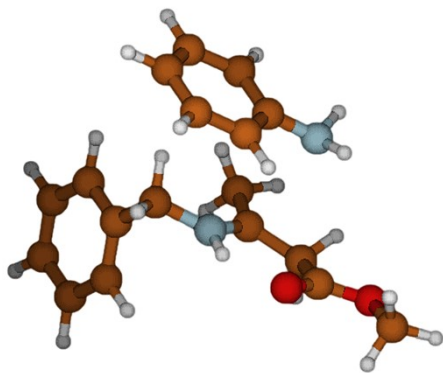

**Figure S28:** INT3 of the exchange between VU\_PhNH<sub>2</sub> and BnNH<sub>2</sub>. The vinylogous urethane structure is stabilized by the hydrogen bonding between the NH group and the oxygen of the carbonyl group (1.830 Å). The NH group of the aniline is distant 2.943 Å from the methylene carbon of the vinylogous urethane from which it will later abstract the proton (TS4).

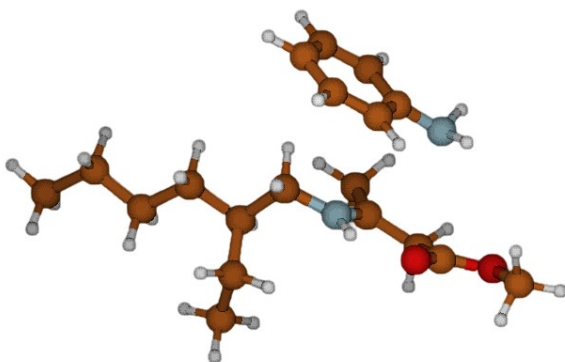

**Figure S29:** INT3 of the exchange between VU\_PhNH<sub>2</sub> and 2-EHA. The vinylogous urethane structure is stabilized by the hydrogen bonding between the NH group and the oxygen of the carbonyl group (1.843 Å). The NH group of the aniline is distant 3.168 Å from the methylene carbon of the vinylogous urethane from which it will later abstract the proton (TS4).

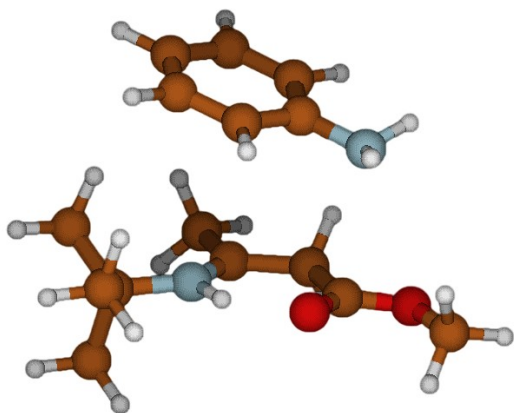

**Figure S30:** INT3 of the exchange between VU\_PhNH<sub>2</sub> and tBuNH<sub>2</sub>. The vinylogous urethane structure is in a cis-conformation stabilized by the hydrogen bonding between the NH group and the oxygen of the carbonyl group (1.770 Å). However, the NH group of the aniline is distant 3.295 Å from the methylene carbon of the vinylogous urethane from which it will later abstract the proton (TS4).

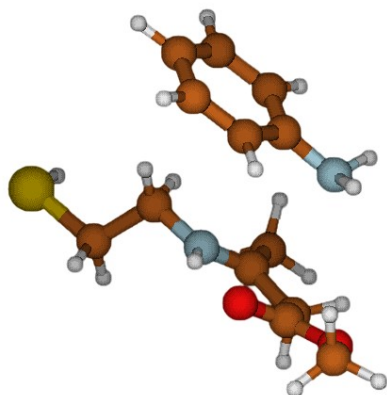

**Figure S31:** INT3 of the exchange between VU\_PhNH<sub>2</sub> and Cys. The vinylogous urethane structure (-23 kcal/mol) is stabilized by the hydrogen bonding between the NH group and the oxygen of the carbonyl group (1.803 Å). The NH group of the aniline is distant 3.161 Å from the methylene carbon of the vinylogous urethane from which it will later subtract the proton (TS4).

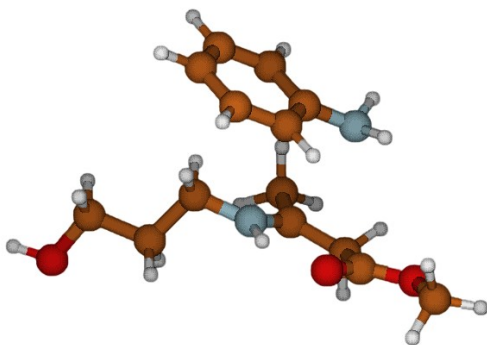

**Figure S32:** INT3 of the exchange between VU\_PhNH<sub>2</sub> and 3-APO. The vinyllogous urethane structure (-20.3 kcal/mol) is stabilized by the hydrogen bonding between the NH group and the oxygen of the carbonyl group (1.835 Å). The NH group of the aniline is distant 3.169 Å from the methylene carbon of the vinyllogous urethane from which it will later subtract the proton (TS4).

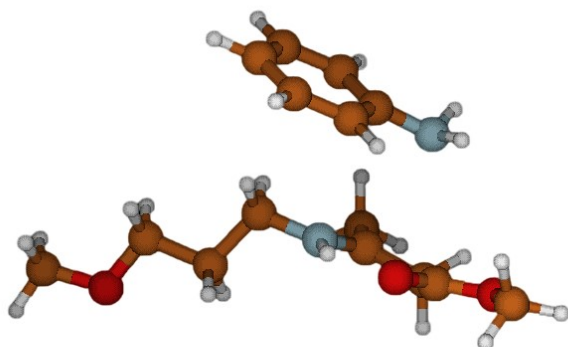

**Figure S33:** INT3 of the exchange between VU\_PhNH<sub>2</sub> and 3-MET. The vinyllogous urethane structure (-20.11 kcal/mol) is stabilized by the hydrogen bonding between the NH group and the oxygen of the carbonyl group (1.836 Å). The NH group of the aniline is distant 3.168 Å from the methylene carbon of the vinyllogous urethane from which it will later subtract the proton (TS4).

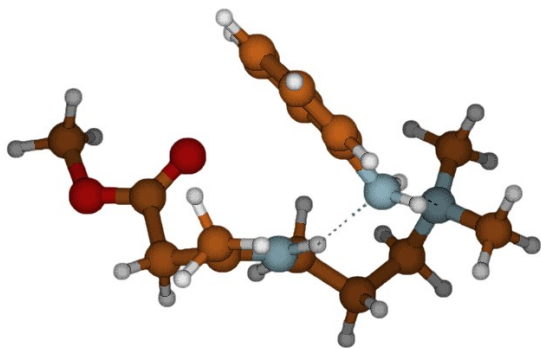

**Figure S34:** INT3 of the exchange between VU\_PhNH<sub>2</sub> and N,N-Diam. The vinyllogous urethane structure (-19.87 kcal/mol) adopts a twisted conformation where the NH group cannot establish hydrogen bonding with the carbonyl oxygen due to interaction with the amino group of the aniline, which in turn interacts with the dimethyl-substituted nitrogen group present in the aliphatic chain.

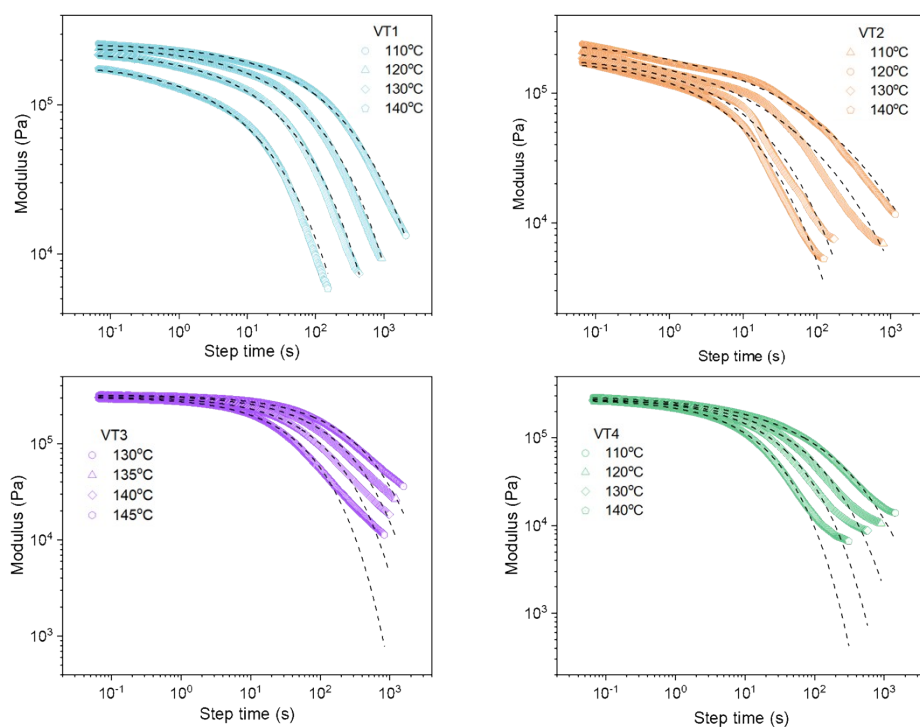

**Figure S35:** Stress relaxation measurements of network VT1, VT2, VT3, and VT4 carried out at various temperatures. The full lines correspond to fits of the data to a stretched exponential of the form  $\sigma(t) = \sigma_0 e^{-\left(\frac{t}{\tau}\right)^\beta}$ .

- (1) Denissen, W.; Rivero, G.; Nicolaÿ, R.; Leibler, L.; Winne, J. M.; Du Prez, F. E. Vinylogous urethane vitrimers *Adv. Funct. Mater.* **2015**, *25*, 2451–2457.
